# Supplementary material for: Peptide Mediated Adhesion to Beta-Lactam Ring of Equine Mesenchymal Stem Cells: A Pilot Study
Source: MDPI journal article supplement (doi:10.3390/ani12060734), 2022-03-15

Supplementary figure S1: panel for Figure 1 A - B

Coating

0  $\mu\text{g/ml}$

5  $\mu\text{g/ml}$

10  $\mu\text{g/ml}$

20  $\mu\text{g/ml}$

2h  
CV6-20

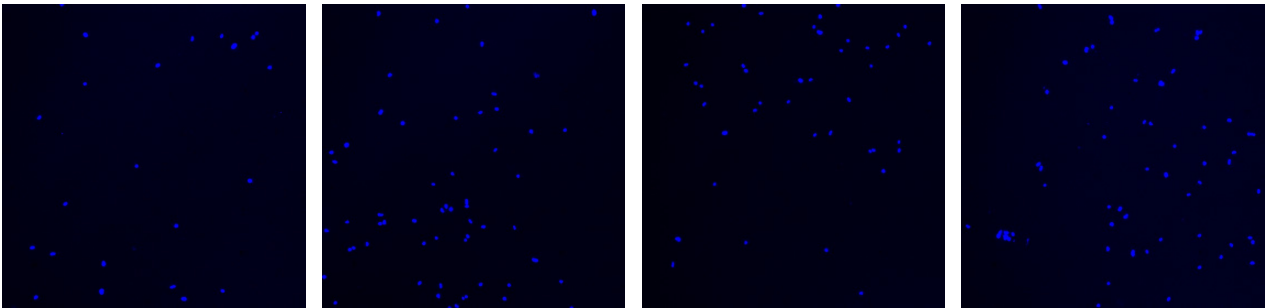

Soluble

2h  
CV6-20

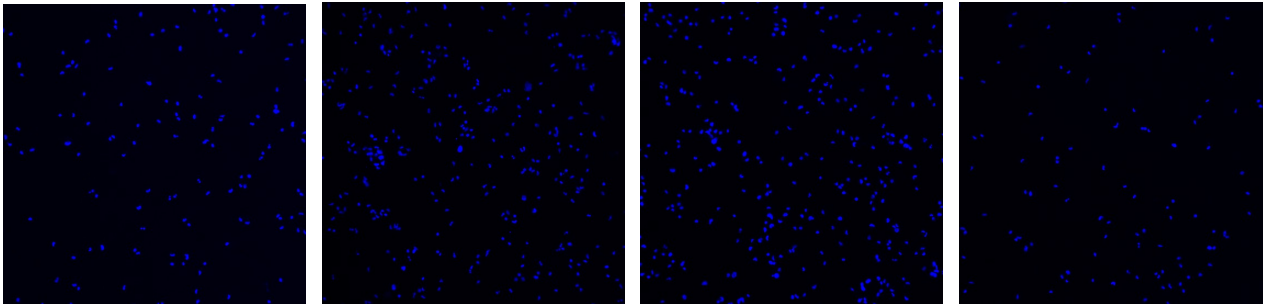

4h  
CV6-20

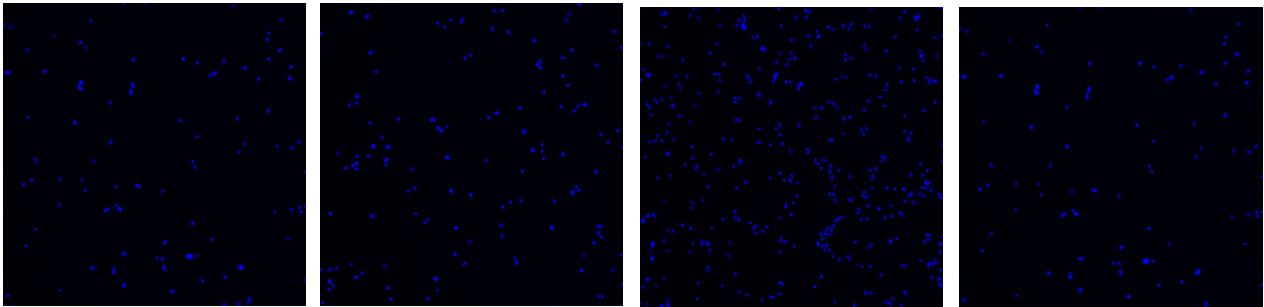

6h  
CV26-20

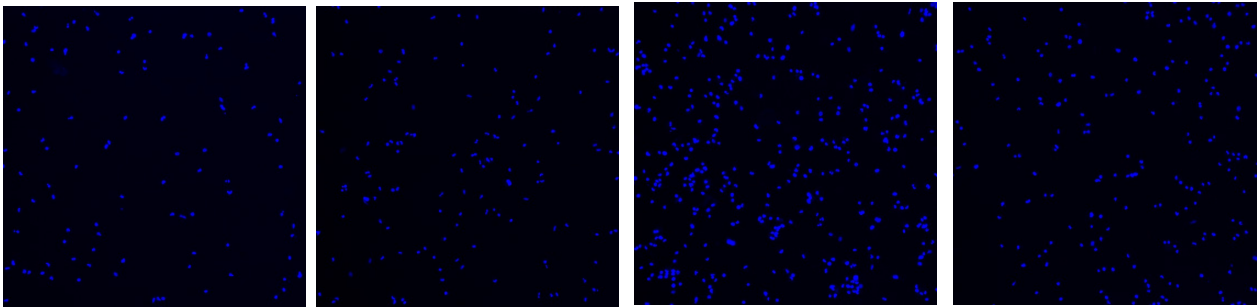

Supplementary Figure S2: panel for Figure 1 C - F

Soluble

0  $\mu\text{g/ml}$

5  $\mu\text{g/ml}$

10  $\mu\text{g/ml}$

20  $\mu\text{g/ml}$

20 min  
CV4-20

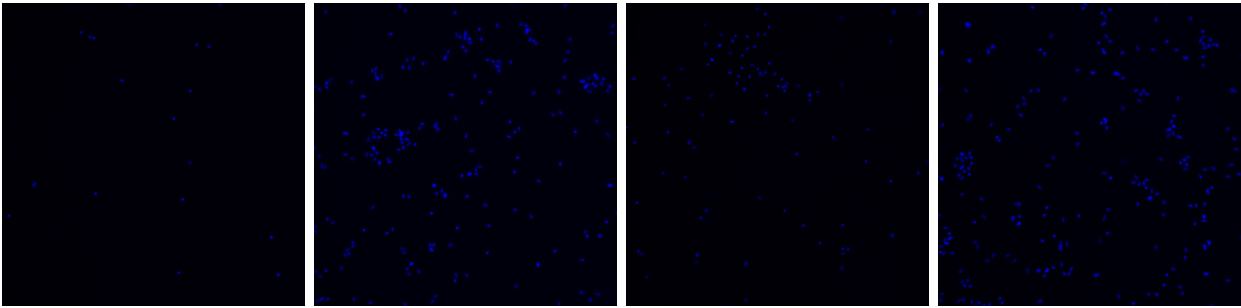

20 min  
CV24-19

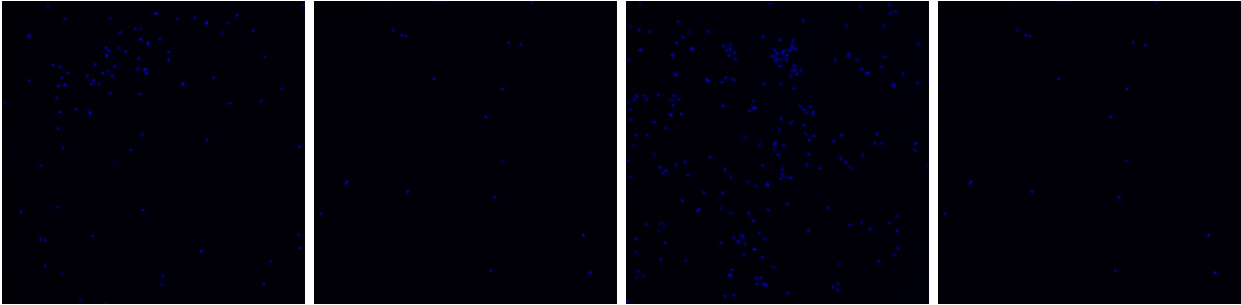

2h  
CV24-19

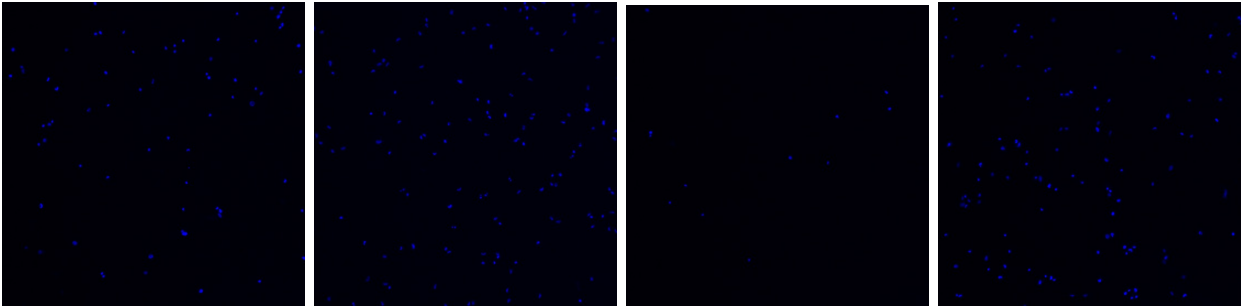

6h  
CV24-19

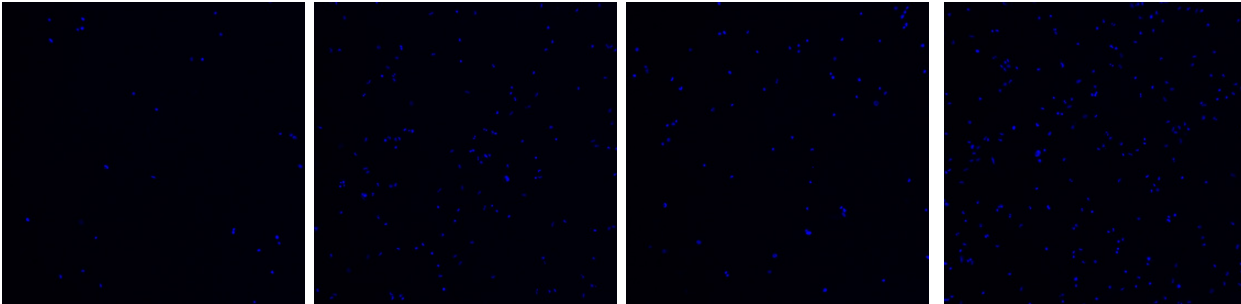

Supplementary Figure S3: panel for Figure 2 B

Soluble

0 µg/ml

5 µg/ml

10 µg/ml

20 µg/ml

20 min  
CV12-15

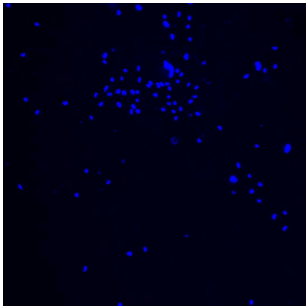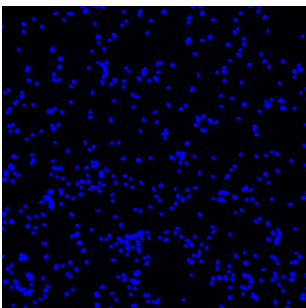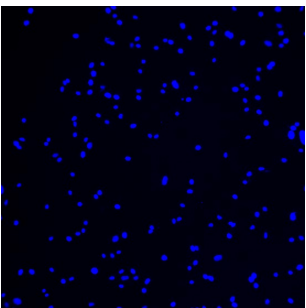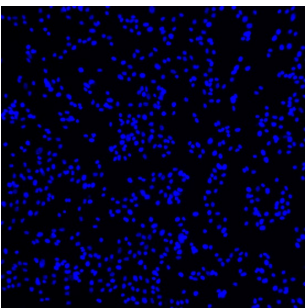

2h  
CV12-15

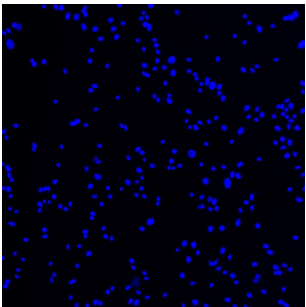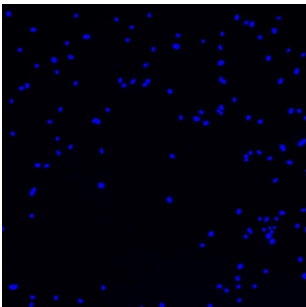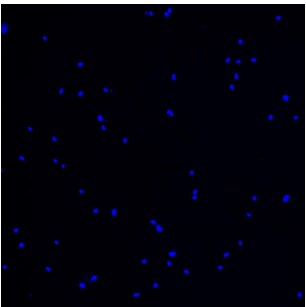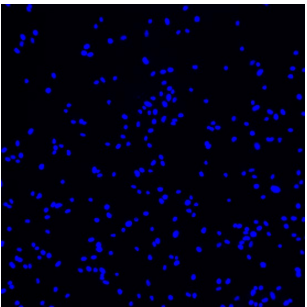

4h  
CV12-15

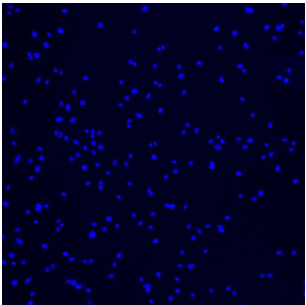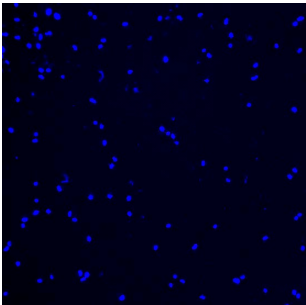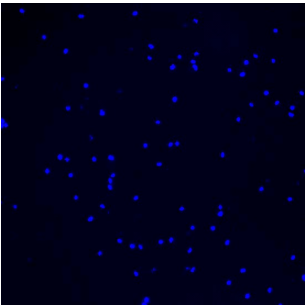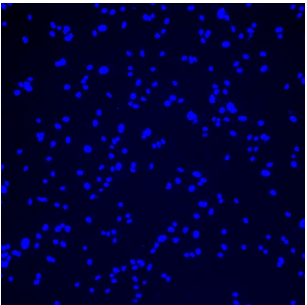

Supplementary Figure S4: panel for Figure 2 D

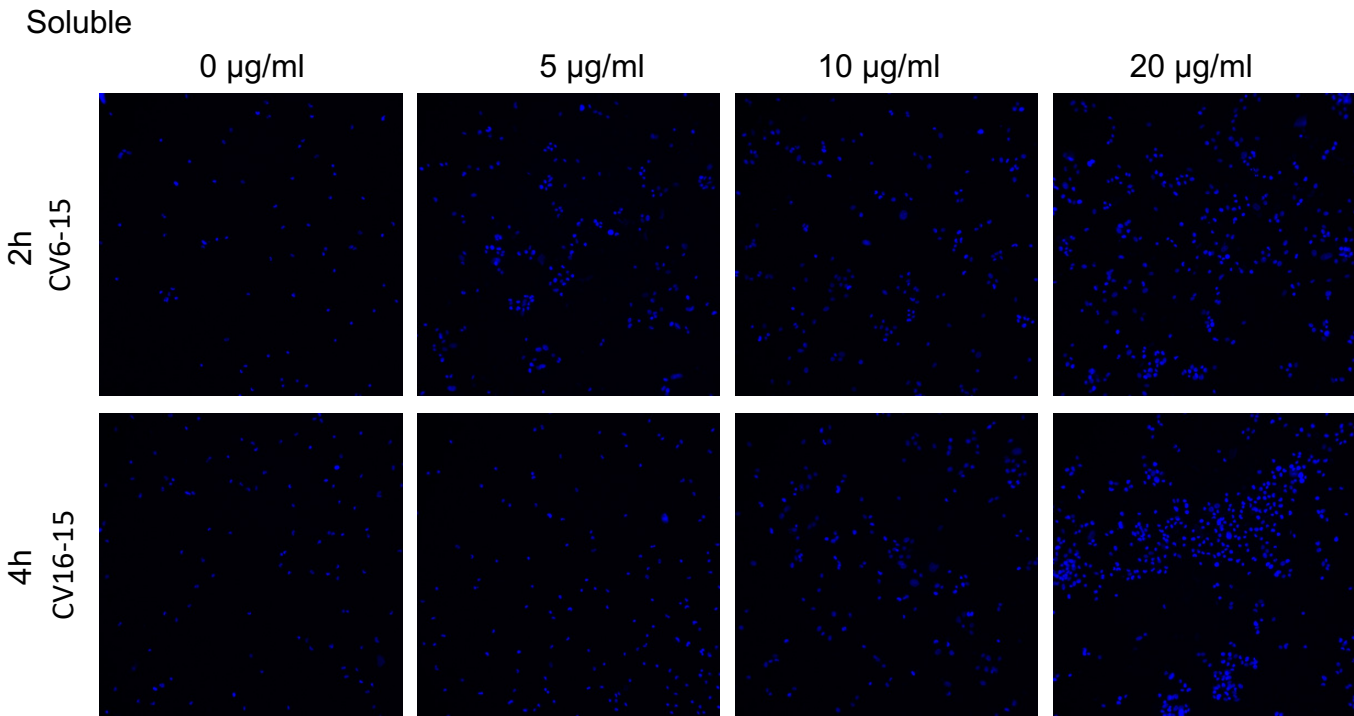

Supplementary: panel for Figure 2 F

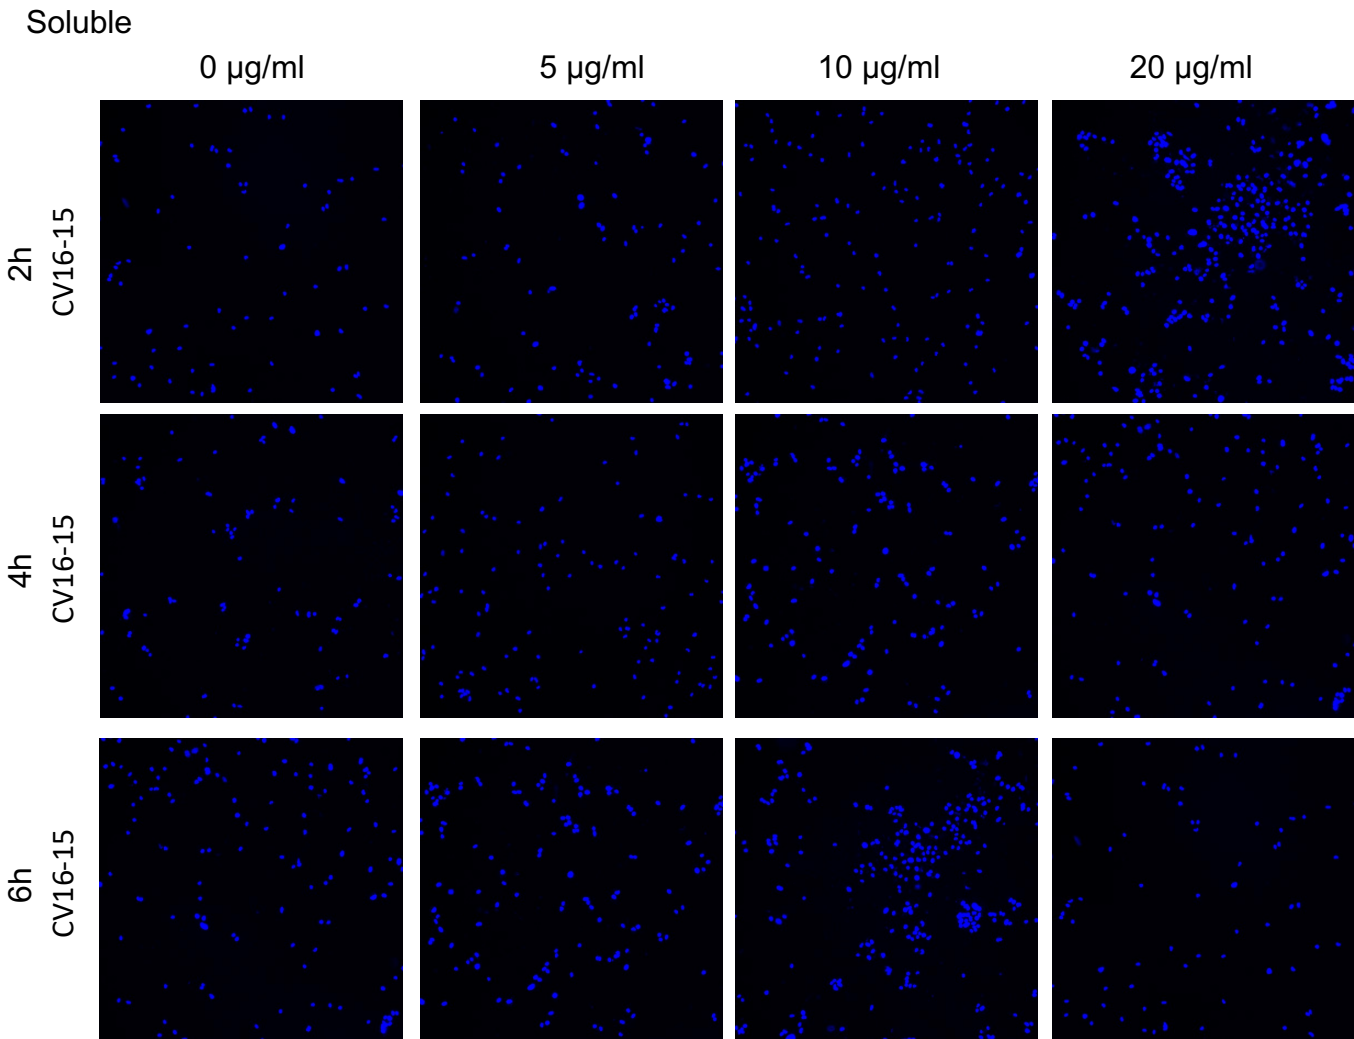

Supplementary Figure S5: gene expression analysis

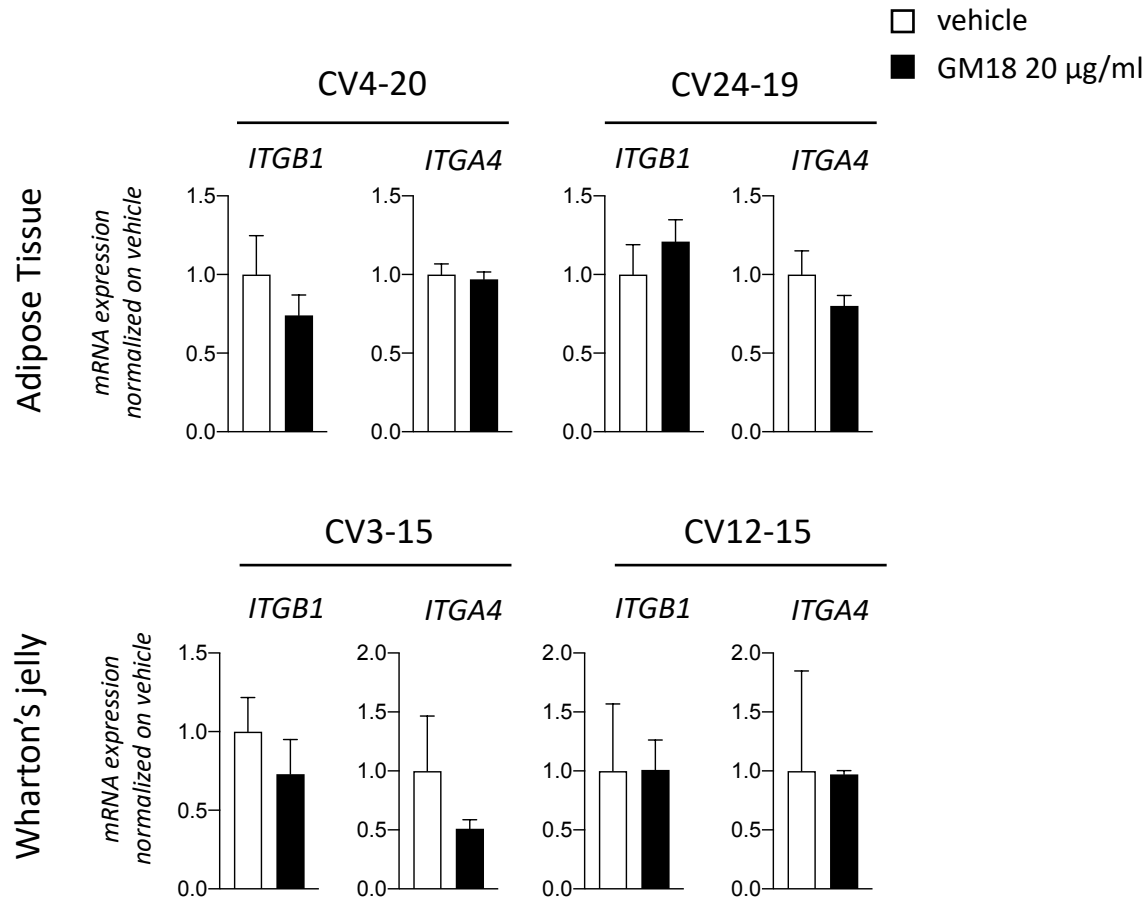



Supplementary Figure S6: HCS analysis of control cultures on glass coverslips

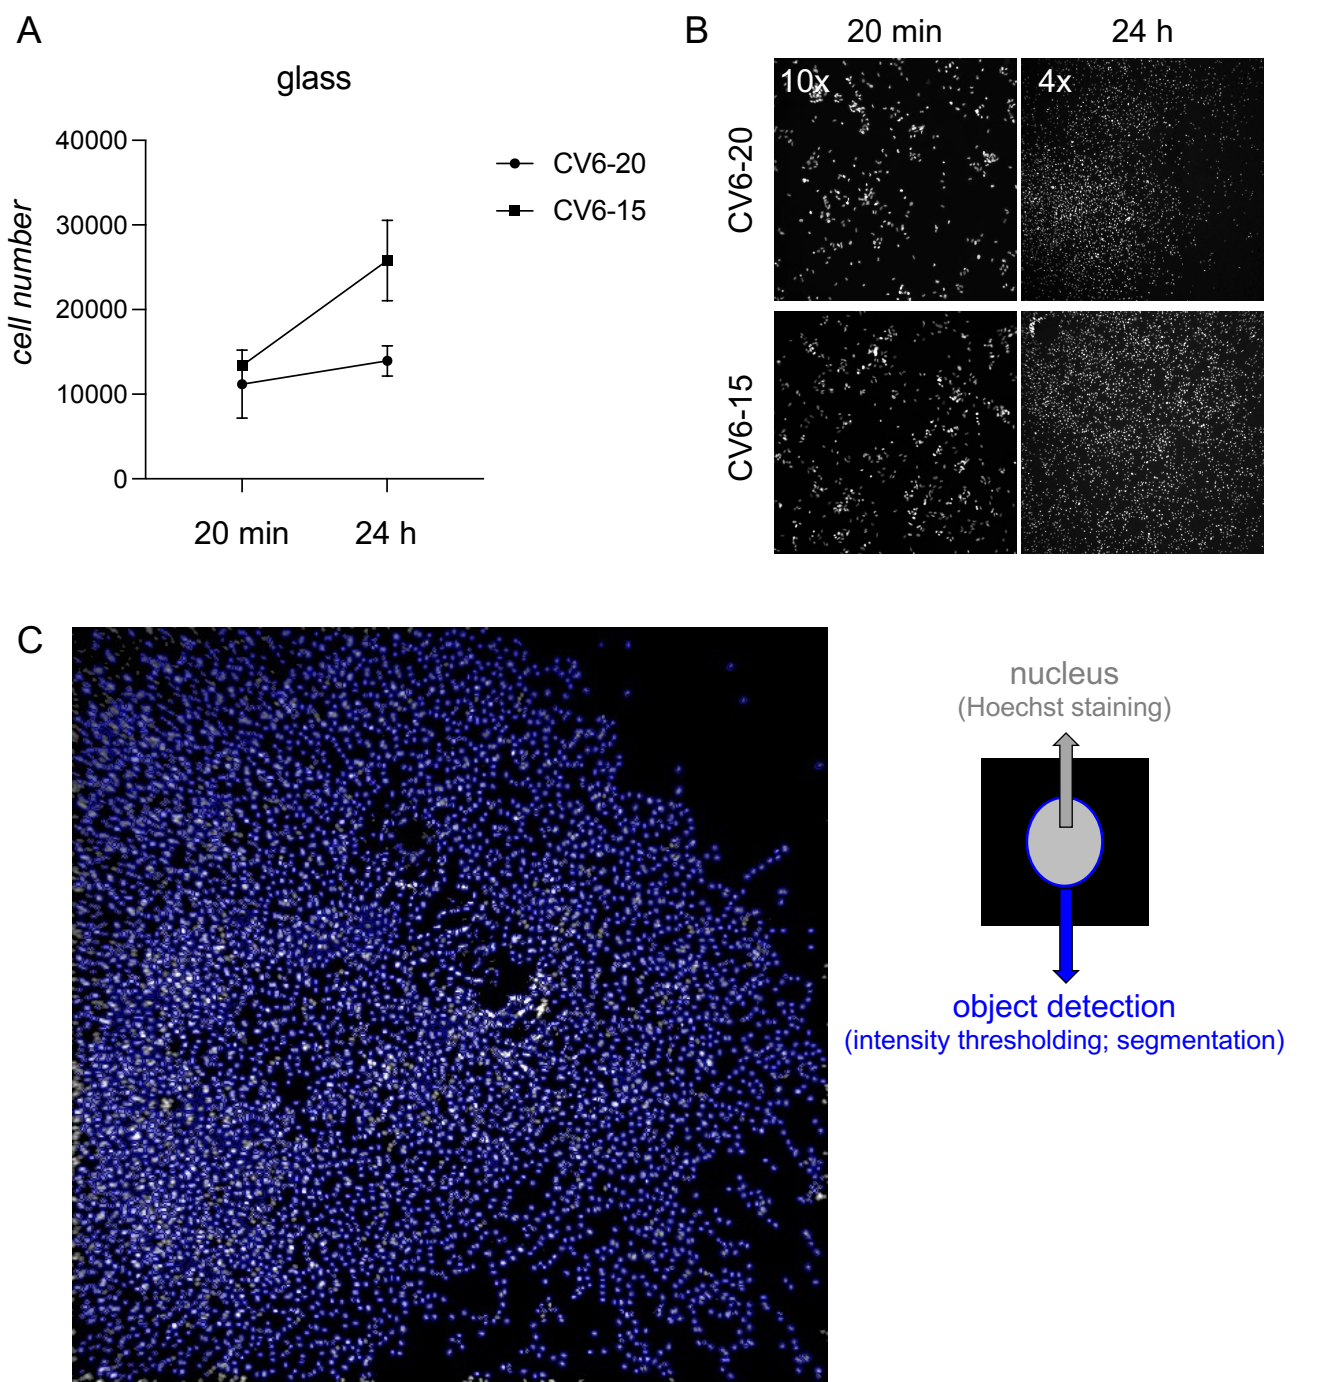

Supplement: s1 [file s1]
